# Supplementary material for: The impact of COVID-19 lockdown on a cohort of adults with recurrent major depressive disorder from Catalonia: a decentralized longitudinal study using remote measurement technology
Source: bioRxiv or medRxiv preprint supplement (doi:10.1101/2023.01.24.23284906), 2023-01-25
Supplement: Supplementary file [file media-2.pdf]

**Table S1. Dates of each phase of pandemic in Catalonia, based on the three studies districts.**

| Phase of pandemic    | Districts        | Starting day | Ending day |
|----------------------|------------------|--------------|------------|
| <i>Pre- lockdown</i> | BAR, TAR and GAR | 01/11/2019   | 10/03/2020 |
| <i>Lockdown</i>      | BAR, TAR and GAR | 11/03/2020   | 26/04/2020 |
| <i>Phase 0</i>       | BAR              | 27/04/2020   | 24/05/2020 |
|                      | TAR              | 27/04/2020   | 10/05/2020 |
|                      | GAR              | 27/04/2020   | 17/05/2020 |
| <i>Phase 1</i>       | BAR              | 25/05/2020   | 07/06/2020 |
|                      | TAR              | 11/05/2020   | 24/05/2020 |
|                      | GAR              | 18/05/2020   | 07/06/2020 |
| <i>Phase 2 and 3</i> | BAR              | 08/06/2020   | 18/06/2020 |
|                      | TAR              | 25/05/2020   | 18/06/2020 |
|                      | GAR              | 08/06/2020   | 18/06/2020 |
| <i>New normality</i> | BAR, TAR and GAR | 19/06/2020   | 16/10/2020 |

**Note:** BAR: Barcelona, TAR: Tarregona, GAR: Garraf.
