# Supplementary material for: The impact of COVID-19 lockdown on a cohort of adults with recurrent major depressive disorder from Catalonia: a decentralized longitudinal study using remote measurement technology
Source: bioRxiv or medRxiv preprint supplement (doi:10.1101/2023.01.24.23284906), 2023-01-25
Supplement: Supplementary file [file media-3.pdf]

**Table S2. Number of participants, observations and average PHQ-8 values in each phase**

| Phases               | Observations | N   | PHQ8   |                  |        |
|----------------------|--------------|-----|--------|------------------|--------|
|                      |              |     | Mean   | CI (95%)         | Median |
| <i>Pre-lockdown</i>  | 659          | 121 | 12.788 | [12.28 to 13.29] | 13     |
| <i>Lockdown</i>      | 215          | 88  | 13.763 | [12.88 to 14.64] | 15     |
| <i>Phase 0</i>       | 109          | 72  | 13.688 | [12.51 to 14.86] | 14     |
| <i>Phase 1</i>       | 66           | 63  | 13.227 | [11.64 to 14.81] | 14     |
| <i>Phases 2-3</i>    | 43           | 40  | 12.163 | [10.18 to 14.15] | 12     |
| <i>New normality</i> | 503          | 84  | 12.048 | [11.49 to 12.61] | 12     |

**Note:** The observations are the PHQ-8 assessments of each phase. N corresponds to the number of people of those 121 who have registration in the corresponding phase.
